# Supplementary material for: GAGA Regulates Border Cell Migration in Drosophila
Source: MDPI journal article supplement (doi:10.3390/ijms21207468), 2020-10-10
Supplement: s1 [file s1]

**Supplementary Table 1.** Primers used for PCR verification of the *Trl* mutations and additional transposon constructs identified within the *alan shepard* (*shep*) and *couch potato* (*cpo*) genes.

| Insertion/deletion                 | P element end | Primer sequence (5'→3')                                 | Approximate amplicon size, bp |
|------------------------------------|---------------|---------------------------------------------------------|-------------------------------|
| <i>Trl</i> <sup>13C</sup>          | 5'            | CAATTGTTGCGCTGCCATGG<br>CACCCAAGGCTCTGCTCCCACAAT        | 1949                          |
|                                    | 3'            | CAATCATATCGCTGTCTCACTCA<br>CGAGTGCGTGGTGTAG             | 1112                          |
| <i>Trl</i> <sup>362</sup>          | 5'            | ATGTGTTTTTCATCCGTGAAGTCG<br>CACCCAAGGCTCTGCTCCCACAAT    | 596                           |
|                                    | 3'            | CAATCATATCGCTGTCTCACTCA<br>CAGACGTTAGTTATTAGCTC         | 1488                          |
| <i>Trl</i> <sup>3609</sup>         | 5'            | CACCCAAGGCTCTGCTCCCACAAT<br>CAGACGTTAGTTATTAGCTC        | 567                           |
|                                    | 3'            | ATGTGTTTTTCATCCGTGAAGTCG<br>CAATCATATCGCTGTCTCACTCA     | 789                           |
| <i>Trl</i> <sup>R85</sup>          | -             | ATTACCAAACGGTCGCATGG<br>CGAGTGCGTGGTGTAG                | 1643                          |
| Transposon in the <i>shep</i> gene | 5'            | CACCCAAGGCTCTGCTCCCACAAT<br>ACCAACCATCAAGTAACTTTGATGAAC | 469                           |
|                                    | 3'            | TTGTTTTGGTCGAAAAGGGATGTG<br>CAATCATATCGCTGTCTCACTCA     | 546                           |
| Transposon in the <i>cpo</i> gene  | 5'            | GATAGTGTAATTATGGCGAAATGG<br>CACCCAAGGCTCTGCTCCCACAAT    | 808                           |
|                                    | 3'            | CAATCATATCGCTGTCTCACTCA<br>GAATAGTTTCTGGTTGCGAGATAG     | 479                           |
