# Supplementary material for: GAGA Regulates Border Cell Migration in Drosophila
Source: MDPI journal article supplement (doi:10.3390/ijms21207468), 2020-10-10
Supplement: s1 [file s1]

**Supplementary Table 2.** RT-qPCR data: mean Cq values obtained and expression values calculated from independent biological replicates. For each biological replicate, three technical replicates were performed.

| Gene        | RNA sample                                                                                                                       | Mean Cq $\pm$ SEM                                                                                                                            | Expression $\pm$ SEM                                                                                                                   | Mean expression $\pm$ SEM |
|-------------|----------------------------------------------------------------------------------------------------------------------------------|----------------------------------------------------------------------------------------------------------------------------------------------|----------------------------------------------------------------------------------------------------------------------------------------|---------------------------|
| <i>slbo</i> | <i>Oregon-R</i>                                                                                                                  | 21.4033 $\pm$ 0.0100<br>21.2402 $\pm$ 0.0281<br>21.8146 $\pm$ 0.0262<br>21.3075 $\pm$ 0.0193<br>21.1520 $\pm$ 0.0265<br>21.0597 $\pm$ 0.0168 | 1.0000 $\pm$ 0.0089<br>0.9837 $\pm$ 0.0209<br>0.7486 $\pm$ 0.0160<br>0.8603 $\pm$ 0.0137<br>0.9591 $\pm$ 0.0191<br>0.8923 $\pm$ 0.0132 | 0.9073 $\pm$ 0.0386       |
|             | <i>slbo</i> <sup>1</sup> / <i>slbo</i> <sup>1</sup>                                                                              | 20.9510 $\pm$ 0.1500<br>21.5323 $\pm$ 0.0148<br>21.6078 $\pm$ 0.0361                                                                         | 0.8319 $\pm$ 0.0868<br>0.7106 $\pm$ 0.0148<br>0.8250 $\pm$ 0.0251                                                                      | 0.7892 $\pm$ 0.0393       |
|             | <i>slbo</i> <sup>1</sup> / <i>slbo</i> <sup>e7b</sup>                                                                            | 23.2401 $\pm$ 0.0165<br>21.5889 $\pm$ 0.1208<br>22.7041 $\pm$ 0.0205                                                                         | 0.3696 $\pm$ 0.0049<br>0.3932 $\pm$ 0.0346<br>0.4606 $\pm$ 0.0207                                                                      | 0.4078 $\pm$ 0.0273       |
|             | <i>Trt</i> <sup>R85</sup> / <i>Trt</i> <sup>362</sup>                                                                            | 23.4109 $\pm$ 0.0562<br>24.0617 $\pm$ 0.0304<br>23.4109 $\pm$ 0.0184                                                                         | 0.1727 $\pm$ 0.0073<br>0.1215 $\pm$ 0.0028<br>0.1902 $\pm$ 0.0096                                                                      | 0.1615 $\pm$ 0.0206       |
|             | <i>hsp83</i> :GAGA-519/+                                                                                                         | 21.2827 $\pm$ 0.0111<br>21.7995 $\pm$ 0.0107<br>21.2256 $\pm$ 0.0232                                                                         | 0.8448 $\pm$ 0.0090<br>1.0795 $\pm$ 0.0115<br>0.8918 $\pm$ 0.0154                                                                      | 0.9387 $\pm$ 0.0717       |
|             | <i>slbo</i> <sup>1</sup> , <i>hsp83</i> :GAGA-519 homo                                                                           | 22.3169 $\pm$ 0.0312<br>21.1566 $\pm$ 0.0031<br>21.3691 $\pm$ 0.0158                                                                         | 0.7485 $\pm$ 0.0192<br>0.8088 $\pm$ 0.0118<br>0.9452 $\pm$ 0.0353                                                                      | 0.8341 $\pm$ 0.0582       |
|             | <i>slbo</i> <sup>1</sup> , <i>hsp83</i> :GAGA-519/ <i>slbo</i> <sup>e7b</sup>                                                    | 22.5245 $\pm$ 0.0636<br>21.8343 $\pm$ 0.0337<br>22.3078 $\pm$ 0.0218                                                                         | 0.4322 $\pm$ 0.0195<br>0.4541 $\pm$ 0.0151<br>0.3890 $\pm$ 0.0072                                                                      | 0.4251 $\pm$ 0.0191       |
|             | <i>hsp83</i> :GAGA-519/+; <i>Trt</i> <sup>R85</sup> / <i>Trt</i> <sup>362</sup>                                                  | 21.7551 $\pm$ 0.1013<br>21.5646 $\pm$ 0.0599<br>21.5249 $\pm$ 0.0218                                                                         | 0.7368 $\pm$ 0.0521<br>0.6723 $\pm$ 0.0285<br>0.7479 $\pm$ 0.0139                                                                      | 0.7190 $\pm$ 0.0236       |
|             | UAS- <i>slbo</i> /+                                                                                                              | 20.7401 $\pm$ 0.0352<br>21.1659 $\pm$ 0.0168<br>20.9844 $\pm$ 0.0361                                                                         | 1.0985 $\pm$ 0.0277<br>0.9951 $\pm$ 0.0208<br>0.9026 $\pm$ 0.0232                                                                      | 0.9987 $\pm$ 0.0020       |
|             | <i>slbo</i> -Gal4 <sup>(Novo16)</sup> >UAS- <i>GFP</i> /UAS- <i>slbo</i> ; +/+                                                   | 18.6033 $\pm$ 0.0110<br>17.7686 $\pm$ 0.0095<br>17.4092 $\pm$ 0.0294                                                                         | 8.6580 $\pm$ 0.2324<br>9.9966 $\pm$ 0.1469<br>10.1240 $\pm$ 0.2193                                                                     | 9.5928 $\pm$ 0.4689       |
|             | <i>slbo</i> -Gal4 <sup>(Novo16)</sup> >UAS- <i>GFP</i> /UAS- <i>slbo</i> ; <i>Trt</i> <sup>R85</sup> / <i>Trt</i> <sup>362</sup> | 20.3940 $\pm$ 0.0211<br>19.6987 $\pm$ 0.0387<br>20.4299 $\pm$ 0.0128                                                                         | 2.0006 $\pm$ 0.0402<br>1.9042 $\pm$ 0.0533<br>1.4538 $\pm$ 0.0217                                                                      | 1.7862 $\pm$ 0.1685       |

Continued on the next page

| Gene       | RNA sample                                                                                   | Mean Cq ± SEM                                                                                                           | Expression ± SEM                                                                                                  | Mean expression ± SEM |
|------------|----------------------------------------------------------------------------------------------|-------------------------------------------------------------------------------------------------------------------------|-------------------------------------------------------------------------------------------------------------------|-----------------------|
| <i>Trl</i> | <i>Oregon-R</i>                                                                              | 17.4477 ± 0.0131*<br>17.2076 ± 0.0261*<br>17.8512 ± 0.1051*<br>17.0084 ± 0.0308<br>17.6403 ± 0.0676<br>17.2768 ± 0.0374 | 1.0000 ± 0.0106*<br>1.0375 ± 0.0207*<br>0.7526 ± 0.0555*<br>1.0915 ± 0.0252<br>0.7051 ± 0.0335<br>0.7916 ± 0.0217 | 0.8964 ± 0.0676       |
|            | <i>slbo<sup>1</sup>/slbo<sup>1</sup></i>                                                     | 16.6745 ± 0.0287<br>17.3330 ± 0.0283<br>17.8322 ± 0.0369                                                                | 1.0391 ± 0.0225<br>0.8414 ± 0.0225<br>0.7282 ± 0.0226                                                             | 0.8696 ± 0.0908       |
|            | <i>slbo<sup>1</sup>/slbo<sup>e7b</sup></i>                                                   | 18.4463 ± 0.0194<br>16.3036 ± 0.0318<br>18.1831 ± 0.0043                                                                | 0.6608 ± 0.0099<br>0.9884 ± 0.0345<br>0.6816 ± 0.0292                                                             | 0.7769 ± 0.1059       |
|            | <i>Trl<sup>R85</sup>/Trl<sup>362</sup></i>                                                   | 22.3587 ± 0.0346<br>22.7990 ± 0.0051<br>22.0243 ± 0.0187                                                                | 0.0231 ± 0.0007<br>0.0188 ± 0.0002<br>0.0321 ± 0.0016                                                             | 0.0246 ± 0.0039       |
|            | <i>hsp83:GAGA-519/+</i>                                                                      | 16.1922 ± 0.0118<br>16.6998 ± 0.0163<br>16.5853 ± 0.0206                                                                | 1.8551 ± 0.0205<br>2.3857 ± 0.0325<br>1.4335 ± 0.0223                                                             | 1.8914 ± 0.2755       |
|            | <i>slbo<sup>1</sup>, hsp83:GAGA-519 homo</i>                                                 | 16.7044 ± 0.0363<br>15.1378 ± 0.0193<br>15.4852 ± 0.0139                                                                | 2.3601 ± 0.0677<br>3.3801 ± 0.0664<br>3.5970 ± 0.1331                                                             | 3.1124 ± 0.3813       |
|            | <i>slbo<sup>1</sup>, hsp83:GAGA-519/slbo<sup>e7b</sup></i>                                   | 16.0997 ± 0.0044<br>14.8628 ± 0.0363<br>16.1232 ± 0.0227                                                                | 2.3933 ± 0.0245<br>3.6730 ± 0.1271<br>1.8238 ± 0.0348                                                             | 2.6300 ± 0.5468       |
|            | <i>hsp83:GAGA-519/+; Trl<sup>R85</sup>/Trl<sup>362</sup></i>                                 | 17.1465 ± 0.0160<br>16.4828 ± 0.0324<br>17.1381 ± 0.0729                                                                | 1.1584 ± 0.0159<br>1.4674 ± 0.0355<br>1.0084 ± 0.0521                                                             | 1.2114 ± 0.1351       |
|            | <i>UAS-slbo/+</i>                                                                            | 17.2734 ± 0.0158<br>16.9452 ± 0.0245<br>16.9969 ± 0.0097                                                                | 0.7827 ± 0.0100<br>1.1957 ± 0.0290<br>0.9227 ± 0.0082                                                             | 0.9670 ± 0.0067       |
|            | <i>slbo-Gal4<sup>(Novo16)</sup>&gt;UAS-GFP/UAS-slbo; +/+</i>                                 | 17.7596 ± 0.0609<br>16.7658 ± 0.0044<br>16.1546 ± 0.0250                                                                | 1.0014 ± 0.0495<br>1.2910 ± 0.0174<br>1.5568 ± 0.0293                                                             | 1.2831 ± 0.1604       |
|            | <i>slbo-Gal4<sup>(Novo16)</sup>&gt;UAS-GFP/UAS-slbo; Trl<sup>R85</sup>/Trl<sup>362</sup></i> | 22.3545 ± 0.0377<br>21.4186 ± 0.0060<br>22.4472 ± 0.0779                                                                | 0.0331 ± 0.0010<br>0.0373 ± 0.0003<br>0.0231 ± 0.0013                                                             | 0.0312 ± 0.0042       |

\* Only these values were used to generate barplot graph shown in Figure 3D.

Continued on the next page

| Gene       | RNA sample                                                                                                       | Mean Cq ± SEM                                            | Expression ± SEM                                      | Mean expression ± SEM |
|------------|------------------------------------------------------------------------------------------------------------------|----------------------------------------------------------|-------------------------------------------------------|-----------------------|
| <i>Trl</i> | <i>slbo</i> -Gal4 <sup>(chic6458)</sup> >UAS- <i>GFP</i>                                                         | 17.7936 ± 0.0371<br>16.9880 ± 0.0468<br>17.7010 ± 0.0131 | 1.0000 ± 0.0372<br>0.9365 ± 0.0332<br>1.0020 ± 0.0107 | 0.9795 ± 0.0215       |
|            | <i>slbo</i> -Gal4 <sup>(chic6458)</sup> >UAS- <i>GFP</i> ; <i>Trl</i> <sup>R85</sup> / <i>Trl</i> <sup>362</sup> | 23.4067 ± 0.0218<br>22.1428 ± 0.1036<br>23.5512 ± 0.0211 | 0.0120 ± 0.0003<br>0.0216 ± 0.0019<br>0.0097 ± 0.0003 | 0.0144 ± 0.0036       |
|            | UAS- <i>GFP</i> /+                                                                                               | 17.2601 ± 0.0144<br>17.0236 ± 0.0207<br>17.5410 ± 0.1272 | 0.7044 ± 0.0101<br>0.7739 ± 0.0166<br>0.5575 ± 0.0496 | 0.6786 ± 0.0638       |
|            | <i>slbo</i> -Gal4 <sup>(Novo11)</sup> >UAS- <i>GFP</i> /+; <i>Trl</i> <sup>R85</sup> / <i>Trl</i> <sup>362</sup> | 22.4464 ± 0.0288<br>22.2090 ± 0.0278<br>22.5509 ± 0.0379 | 0.0270 ± 0.0006<br>0.0214 ± 0.0004<br>0.0240 ± 0.0006 | 0.0241 ± 0.0016       |
|            | <i>slbo</i> -Gal4 <sup>(Novo16)</sup> >UAS- <i>GFP</i> /+; <i>Trl</i> <sup>R85</sup> / <i>Trl</i> <sup>362</sup> | 21.5352 ± 0.0262<br>22.9905 ± 0.0117<br>21.4024 ± 0.0575 | 0.0353 ± 0.0008<br>0.0297 ± 0.0004<br>0.0268 ± 0.0016 | 0.0306 ± 0.0025       |
|            | <i>slbo</i> -Gal4 <sup>(Novo22)</sup> >UAS- <i>GFP</i> /+; <i>Trl</i> <sup>R85</sup> / <i>Trl</i> <sup>362</sup> | 23.2754 ± 0.0385<br>22.1463 ± 0.0442<br>23.0400 ± 0.0302 | 0.0216 ± 0.0006<br>0.0225 ± 0.0007<br>0.0132 ± 0.0003 | 0.0191 ± 0.0029       |
|            | <i>slbo</i> -Gal4 <sup>(Novo11)</sup> >UAS- <i>GFP</i> /+; +/+                                                   | 17.5681 ± 0.0118<br>16.1867 ± 0.0322<br>18.6205 ± 0.0240 | 0.5668 ± 0.0053<br>1.0332 ± 0.0258<br>0.5736 ± 0.0096 | 0.7245 ± 0.1543       |
|            | <i>slbo</i> -Gal4 <sup>(Novo16)</sup> >UAS- <i>GFP</i> /+; +/+                                                   | 17.1742 ± 0.0150<br>17.0610 ± 0.0387<br>17.1287 ± 0.0222 | 0.7765 ± 0.0088<br>0.9510 ± 0.0295<br>1.2057 ± 0.0192 | 0.9777 ± 0.1246       |
|            | <i>slbo</i> -Gal4 <sup>(Novo22)</sup> >UAS- <i>GFP</i> /+; +/+                                                   | 17.5922 ± 0.0237<br>16.8562 ± 0.0017<br>17.5055 ± 0.0190 | 0.6747 ± 0.0114<br>0.8599 ± 0.0066<br>0.5862 ± 0.0081 | 0.7069 ± 0.0807       |

Continued on the next page

| Gene | RNA sample                                                                                                       | Mean Cq ± SEM*                                           | Expression ± SEM                                      | Mean expression ± SEM |
|------|------------------------------------------------------------------------------------------------------------------|----------------------------------------------------------|-------------------------------------------------------|-----------------------|
| GFP  | <i>slbo</i> -Gal4 <sup>(chic6458)</sup> >UAS- <i>GFP</i>                                                         | 20.0186 ± 0.0315<br>19.2386 ± 0.1306<br>19.8383 ± 0.0058 | 1.0000 ± 0.0276<br>0.9201 ± 0.0844<br>1.0648 ± 0.0074 | 0.9949 ± 0.0419       |
|      | <i>slbo</i> -Gal4 <sup>(chic6458)</sup> >UAS- <i>GFP</i> ; <i>Trl</i> <sup>R85</sup> / <i>Trl</i> <sup>362</sup> | 20.1867 ± 0.0164<br>19.7377 ± 0.1247<br>20.0563 ± 0.0337 | 0.4183 ± 0.0096<br>0.5348 ± 0.0527<br>0.5095 ± 0.0168 | 0.4875 ± 0.0354       |
|      | UAS- <i>GFP</i> /+                                                                                               | 25.5306 ± 0.0299<br>25.6610 ± 0.1191<br>26.2022 ± 0.0424 | 0.0107 ± 0.0002<br>0.0091 ± 0.0008<br>0.0064 ± 0.0002 | 0.0087 ± 0.0012       |
|      | <i>slbo</i> -Gal4 <sup>(Novo11)</sup> >UAS- <i>GFP</i> /+; <i>Trl</i> <sup>R85</sup> / <i>Trl</i> <sup>362</sup> | 19.1414 ± 0.1227<br>18.4283 ± 0.1266<br>19.3489 ± 0.0039 | 1.2497 ± 0.1074<br>1.3720 ± 0.1208<br>1.0335 ± 0.0063 | 1.2184 ± 0.0990       |
|      | <i>slbo</i> -Gal4 <sup>(Novo16)</sup> >UAS- <i>GFP</i> /+; <i>Trl</i> <sup>R85</sup> / <i>Trl</i> <sup>362</sup> | 19.6704 ± 0.0279<br>20.9456 ± 0.0167<br>19.0771 ± 0.0202 | 0.6013 ± 0.0143<br>0.5720 ± 0.0093<br>0.6272 ± 0.0285 | 0.6001 ± 0.0159       |
|      | <i>slbo</i> -Gal4 <sup>(Novo22)</sup> >UAS- <i>GFP</i> /+; <i>Trl</i> <sup>R85</sup> / <i>Trl</i> <sup>362</sup> | 19.7699 ± 0.0132<br>18.9388 ± 0.0397<br>20.1770 ± 0.0107 | 1.1476 ± 0.0167<br>0.9709 ± 0.0271<br>0.4504 ± 0.0045 | 0.8563 ± 0.2092       |
|      | <i>slbo</i> -Gal4 <sup>(Novo11)</sup> >UAS- <i>GFP</i> /+; +/+                                                   | 17.8585 ± 0.0184<br>17.0155 ± 0.0044<br>19.3416 ± 0.0223 | 2.1668 ± 0.0294<br>2.7195 ± 0.0316<br>1.6269 ± 0.0253 | 2.1711 ± 0.3154       |
|      | <i>slbo</i> -Gal4 <sup>(Novo16)</sup> >UAS- <i>GFP</i> /+; +/+                                                   | 17.5969 ± 0.0247<br>17.2318 ± 0.0212<br>18.1911 ± 0.0075 | 2.7082 ± 0.0480<br>3.9495 ± 0.0844<br>2.6990 ± 0.0177 | 3.1189 ± 0.4153       |
|      | <i>slbo</i> -Gal4 <sup>(Novo22)</sup> >UAS- <i>GFP</i> /+; +/+                                                   | 18.5000 ± 0.0219<br>17.2628 ± 0.0215<br>17.7933 ± 0.0228 | 1.6812 ± 0.0264<br>3.0328 ± 0.0506<br>2.2449 ± 0.0367 | 2.3196 ± 0.3920       |
|      | <i>Oregon-R</i>                                                                                                  | 34.0374 ± 0.0217<br>34.0883 ± 0.0211<br>35.1408 ± 0.0220 | 0.0000 ± 0.0000<br>0.0001 ± 0.0000<br>0.0001 ± 0.0000 | 0.0001 ± 0.0000       |

Continued on the next page

| Gene  | RNA sample                                                                                                                       | Mean Cq ± SEM                                                                                                           |
|-------|----------------------------------------------------------------------------------------------------------------------------------|-------------------------------------------------------------------------------------------------------------------------|
| RpL32 | <i>Oregon-R</i>                                                                                                                  | 11.3093 ± 0.0243*<br>11.1168 ± 0.0239*<br>11.2807 ± 0.0278*<br>11.0365 ± 0.0199<br>10.9731 ± 0.0161<br>10.4530 ± 0.0240 |
|       | <i>slbo</i> <sup>1</sup> / <i>slbo</i> <sup>1</sup>                                                                              | 10.4235 ± 0.0231<br>11.0258 ± 0.0157<br>11.1129 ± 0.0136                                                                |
|       | <i>slbo</i> <sup>1</sup> / <i>slbo</i> <sup>e7b</sup>                                                                            | 11.3562 ± 0.0159<br>11.2119 ± 0.0264<br>10.0382 ± 0.0767                                                                |
|       | <i>Trl</i> <sup>R85</sup> / <i>Trl</i> <sup>362</sup>                                                                            | 10.6344 ± 0.0405<br>11.0197 ± 0.0279<br>10.7844 ± 0.1400                                                                |
|       | <i>hsp83</i> :GAGA-519/+                                                                                                         | 10.9918 ± 0.0084<br>11.8778 ± 0.0216<br>11.0085 ± 0.0159                                                                |
|       | <i>slbo</i> <sup>1</sup> , <i>hsp83</i> :GAGA-519 homo                                                                           | 11.5087 ± 0.0369<br>10.4690 ± 0.0345<br>11.0463 ± 0.1026                                                                |
|       | <i>slbo</i> <sup>1</sup> , <i>hsp83</i> :GAGA-519/ <i>slbo</i> <sup>e7b</sup>                                                    | 11.0739 ± 0.0045<br>10.5279 ± 0.0603<br>10.5635 ± 0.0308                                                                |
|       | <i>hsp83</i> :GAGA-519/+; <i>Trl</i> <sup>R85</sup> / <i>Trl</i> <sup>362</sup>                                                  | 11.0243 ± 0.0188<br>10.6500 ± 0.0260<br>10.7027 ± 0.0259                                                                |
|       | UAS- <i>slbo</i> /+                                                                                                              | 10.4712 ± 0.0170<br>11.0460 ± 0.0493<br>10.6375 ± 0.0060                                                                |
|       | <i>slbo</i> -Gal4 <sup>(Novo16)</sup> >UAS- <i>GFP</i> /UAS- <i>slbo</i> ; +/+                                                   | 11.6797 ± 0.0695<br>11.0932 ± 0.0371<br>10.7723 ± 0.0090                                                                |
|       | <i>slbo</i> -Gal4 <sup>(Novo16)</sup> >UAS- <i>GFP</i> /UAS- <i>slbo</i> ; <i>Trl</i> <sup>R85</sup> / <i>Trl</i> <sup>362</sup> | 11.3647 ± 0.0298<br>10.5661 ± 0.0148<br>10.6456 ± 0.0337                                                                |

\* Only these values were used to generate barplot graph shown in Figure 3D.

Continued on the next page

| Gene         | RNA sample                                                                                                       | Mean Cq $\pm$ SEM                                                    |
|--------------|------------------------------------------------------------------------------------------------------------------|----------------------------------------------------------------------|
| <i>RpL32</i> | <i>slbo</i> -Gal4 <sup>(chic6458)</sup> >UAS- <i>GFP</i>                                                         | 12.2724 $\pm$ 0.0186<br>11.2995 $\pm$ 0.0409<br>12.0544 $\pm$ 0.0135 |
|              | <i>slbo</i> -Gal4 <sup>(chic6458)</sup> >UAS- <i>GFP</i> ; <i>Trt</i> <sup>R85</sup> / <i>Trt</i> <sup>362</sup> | 11.2079 $\pm$ 0.0381<br>10.9230 $\pm$ 0.1358<br>11.2168 $\pm$ 0.0650 |
|              | UAS- <i>GFP</i> /+                                                                                               | 11.1445 $\pm$ 0.0117<br>11.0446 $\pm$ 0.0137<br>11.1408 $\pm$ 0.0341 |
|              | <i>slbo</i> -Gal4 <sup>(Novo11)</sup> >UAS- <i>GFP</i> /+; <i>Trt</i> <sup>R85</sup> / <i>Trt</i> <sup>362</sup> | 11.8304 $\pm$ 0.0328<br>11.1455 $\pm$ 0.0169<br>11.7485 $\pm$ 0.0059 |
|              | <i>slbo</i> -Gal4 <sup>(Novo16)</sup> >UAS- <i>GFP</i> /+; <i>Trt</i> <sup>R85</sup> / <i>Trt</i> <sup>362</sup> | 11.1844 $\pm$ 0.0344<br>12.2663 $\pm$ 0.0294<br>10.4702 $\pm$ 0.0256 |
|              | <i>slbo</i> -Gal4 <sup>(Novo22)</sup> >UAS- <i>GFP</i> /+; <i>Trt</i> <sup>R85</sup> / <i>Trt</i> <sup>362</sup> | 11.2351 $\pm$ 0.0144<br>12.2131 $\pm$ 0.0276<br>11.1389 $\pm$ 0.0118 |
|              | <i>slbo</i> -Gal4 <sup>(Novo11)</sup> >UAS- <i>GFP</i> /+; +/+                                                   | 11.0914 $\pm$ 0.0003<br>10.4621 $\pm$ 0.0257<br>12.1531 $\pm$ 0.0026 |
|              | <i>slbo</i> -Gal4 <sup>(Novo16)</sup> >UAS- <i>GFP</i> /+; +/+                                                   | 11.2254 $\pm$ 0.0102<br>11.2349 $\pm$ 0.0438<br>11.8066 $\pm$ 0.0042 |
|              | <i>slbo</i> -Gal4 <sup>(Novo22)</sup> >UAS- <i>GFP</i> /+; +/+                                                   | 11.4216 $\pm$ 0.0056<br>11.0740 $\pm$ 0.0217<br>11.1010 $\pm$ 0.0092 |

Continued on the next page

| Gene  | RNA sample                                                                                                                       | Mean Cq ± SEM                                                                                                           |
|-------|----------------------------------------------------------------------------------------------------------------------------------|-------------------------------------------------------------------------------------------------------------------------|
| Rap2l | <i>Oregon-R</i>                                                                                                                  | 15.2012 ± 0.0069*<br>15.0200 ± 0.0053*<br>15.2168 ± 0.0166*<br>14.8481 ± 0.0151<br>14.9144 ± 0.0150<br>15.0417 ± 0.0108 |
|       | <i>slbo</i> <sup>1</sup> / <i>slbo</i> <sup>1</sup>                                                                              | 14.6515 ± 0.0087<br>14.7571 ± 0.0497<br>15.2516 ± 0.0485                                                                |
|       | <i>slbo</i> <sup>1</sup> / <i>slbo</i> <sup>e7b</sup>                                                                            | 15.8760 ± 0.0103<br>14.1505 ± 0.0152<br>15.5834 ± 0.1203                                                                |
|       | <i>Trl</i> <sup>R85</sup> / <i>Trl</i> <sup>362</sup>                                                                            | 14.8235 ± 0.0227<br>14.7265 ± 0.0086<br>14.9525 ± 0.0071                                                                |
|       | <i>hsp83</i> :GAGA-519/+                                                                                                         | 14.7908 ± 0.0197<br>15.6458 ± 0.0040<br>14.8163 ± 0.0084                                                                |
|       | <i>slbo</i> <sup>1</sup> , <i>hsp83</i> :GAGA-519 homo                                                                           | 15.9930 ± 0.0139<br>14.9359 ± 0.0232<br>15.2330 ± 0.0098                                                                |
|       | <i>slbo</i> <sup>1</sup> , <i>hsp83</i> :GAGA-519/ <i>slbo</i> <sup>e7b</sup>                                                    | 15.1787 ± 0.0279<br>14.5668 ± 0.0325<br>15.0320 ± 0.0044                                                                |
|       | <i>hsp83</i> :GAGA-519/+; <i>Trl</i> <sup>R85</sup> / <i>Trl</i> <sup>362</sup>                                                  | 15.2283 ± 0.0140<br>14.9846 ± 0.0005<br>15.1858 ± 0.0169                                                                |
|       | UAS- <i>slbo</i> /+                                                                                                              | 14.9039 ± 0.0085<br>14.9754 ± 0.0086<br>14.7395 ± 0.0158                                                                |
|       | <i>slbo</i> -Gal4 <sup>(Novo16)</sup> >UAS- <i>GFP</i> /UAS- <i>slbo</i> ; +/+                                                   | 15.4589 ± 0.0262<br>14.7908 ± 0.0076<br>14.4294 ± 0.0193                                                                |
|       | <i>slbo</i> -Gal4 <sup>(Novo16)</sup> >UAS- <i>GFP</i> /UAS- <i>slbo</i> ; <i>Trl</i> <sup>R85</sup> / <i>Trl</i> <sup>362</sup> | 15.1281 ± 0.0264<br>14.3935 ± 0.0172<br>14.9977 ± 0.0075                                                                |

\* Only these values were used to generate barplot graph shown in Figure 3D.

Continued on the next page

| Gene         | RNA sample                                                                                                       | Mean Cq $\pm$ SEM                                                    |
|--------------|------------------------------------------------------------------------------------------------------------------|----------------------------------------------------------------------|
| <i>Rap2l</i> | <i>slbo</i> -Gal4 <sup>(chic6458)</sup> >UAS- <i>GFP</i>                                                         | 16.1519 $\pm$ 0.0448<br>15.3243 $\pm$ 0.0073<br>16.1905 $\pm$ 0.0092 |
|              | <i>slbo</i> -Gal4 <sup>(chic6458)</sup> >UAS- <i>GFP</i> ; <i>Trt</i> <sup>R85</sup> / <i>Trt</i> <sup>362</sup> | 15.2957 $\pm$ 0.0434<br>15.1335 $\pm$ 0.0117<br>15.3372 $\pm$ 0.0150 |
|              | UAS- <i>GFP</i> /+                                                                                               | 15.2017 $\pm$ 0.0276<br>15.1000 $\pm$ 0.0439<br>15.0925 $\pm$ 0.0101 |
|              | <i>slbo</i> -Gal4 <sup>(Novo11)</sup> >UAS- <i>GFP</i> /+; <i>Trt</i> <sup>R85</sup> / <i>Trt</i> <sup>362</sup> | 15.4826 $\pm$ 0.0149<br>15.0108 $\pm$ 0.0136<br>15.4315 $\pm$ 0.0147 |
|              | <i>slbo</i> -Gal4 <sup>(Novo16)</sup> >UAS- <i>GFP</i> /+; <i>Trt</i> <sup>R85</sup> / <i>Trt</i> <sup>362</sup> | 15.0756 $\pm$ 0.0195<br>16.4002 $\pm$ 0.0143<br>14.7250 $\pm$ 0.1219 |
|              | <i>slbo</i> -Gal4 <sup>(Novo22)</sup> >UAS- <i>GFP</i> /+; <i>Trt</i> <sup>R85</sup> / <i>Trt</i> <sup>362</sup> | 15.2049 $\pm$ 0.0134<br>16.1109 $\pm$ 0.0170<br>15.0406 $\pm$ 0.0056 |
|              | <i>slbo</i> -Gal4 <sup>(Novo11)</sup> >UAS- <i>GFP</i> /+; +/+                                                   | 15.2438 $\pm$ 0.0134<br>14.8426 $\pm$ 0.0196<br>16.3214 $\pm$ 0.0023 |
|              | <i>slbo</i> -Gal4 <sup>(Novo16)</sup> >UAS- <i>GFP</i> /+; +/+                                                   | 15.2302 $\pm$ 0.0080<br>15.5792 $\pm$ 0.0096<br>15.8276 $\pm$ 0.0108 |
|              | <i>slbo</i> -Gal4 <sup>(Novo22)</sup> >UAS- <i>GFP</i> /+; +/+                                                   | 15.4644 $\pm$ 0.0097<br>15.0399 $\pm$ 0.0018<br>15.2059 $\pm$ 0.0079 |
